# Supplementary material
Source: Elsevier journal article supplement (https://www.sciencedirect.com/science/article/pii/S0014256519302358)
Supplement: mmc1 [file S0014256519302358:mmc1.pdf]

## TABLAS Y FIGURAS SUPLEMENTARIAS

**Tabla 1S. Principales presentaciones orales de hierro comercializadas en España**

| Compuesto                   | Nombre comercial   | Presentación                      | Fe elemento (mg) |
|-----------------------------|--------------------|-----------------------------------|------------------|
| <b>Sales ferrosas</b>       |                    |                                   |                  |
| <b>Sulfato ferroso</b>      | Tardyferon®        | Comprimidos recubiertos           | 80               |
|                             | Ferrogradumet®     | Comprimidos liberación prolongada | 105              |
| <b>Ferroglicina sulfato</b> | Ferbisol®          | Cápsulas gastrorresistentes       | 100              |
|                             | Ferrosanol®        | Cápsulas gastrorresistentes       | 100              |
|                             | Glutaferro gotas®  | Gotas                             | 30               |
| <b>Lactato ferroso</b>      | Cromatombic ferro® | Vial bebible                      | 37,5             |
| <b>Gluconato ferroso</b>    | Losferron®         | Comprimidos efervescentes         | 80               |

**Tabla 2S. Características de la administración de los distintos preparados de hierro endovenoso (FEEV) disponibles en España**

|                                     | Fe sacarosa (Venofer®)     | Fe dextrano BPM (Cosmofer®) | Fe carboximaltosa (Ferinject®) | Fe isomaltosa <sup>a</sup> (Monofer®) |
|-------------------------------------|----------------------------|-----------------------------|--------------------------------|---------------------------------------|
| Concentración                       | 20 mg/mL                   | 50 mg/mL                    | 50 mg/mL                       | 100 mg/mL                             |
| Dosificación                        | Múltiples dosis 100-200 mg | Múltiples dosis 100-200 mg  | 20 mg/kg                       | 20 mg/kg                              |
| Dosis máximas en una única infusión | 200 mg                     | 20 mg/kg                    | 1.000 g                        | 20 mg/kg                              |
| Tiempo de infusión                  | 15-60 minutos              | 60 minutos                  | 6-15 minutos                   | 15-60 minutos                         |

<sup>a</sup>Véase la alerta de la Agencia Española de Medicamentos y Productos Sanitarios (AEMPS) de julio de 2017. Fe, hierro; BPM, bajo peso molecular.

**Tabla 3S. Indicaciones de tratamiento con hierro en pacientes con enfermedad renal crónica. Recomendaciones de las sociedades científicas internacionales**

| Sociedad                                       | Indicación de tratamiento con hierro                                                                                                                                                                              | Límite superior                                               |
|------------------------------------------------|-------------------------------------------------------------------------------------------------------------------------------------------------------------------------------------------------------------------|---------------------------------------------------------------|
| KDIGO (2012)                                   | Tratados con AEEs<br>Nunca antes AEEs<br>Ft <500 ng/mL<br>IST <30%                                                                                                                                                | Ft 500 ng/mL<br>IST 30%                                       |
| ERBP (2013)                                    | Nunca antes AEEs<br><br>ERC no en diálisis<br>Ft <200 ng/mL<br>IST <25%<br><br>ERC en diálisis<br>Ft <300 ng/mL<br>IST <25%<br><br>Tratamiento con AEEs<br>ERC todos estadios<br>Ferritina <300 ng/mL<br>IST <30% | Ft 500 ng/mL<br>IST 30%                                       |
| KDOQI (2013)                                   | ERC todos los estadios<br>Ft <500 ng/mL<br>IST <30%                                                                                                                                                               | No límite<br>Si Ft elevada, ponderar<br>riesgos vs beneficios |
| Sociedad<br>Canadiense de<br>Nefrología (2013) | ERC todos los estadios<br>Ft <500 ng/mL<br>IST <30%                                                                                                                                                               | No límite                                                     |
| NICE (2015)                                    | ERC todos estadios<br>Ft <200 ng/mL<br>IST <20% (salvo Ft >800 ng/mL)<br>%Hypo >6% (salvo Ft >800 ng/mL)                                                                                                          | Ft 500-800 ng/mL                                              |
| CARI (2013)                                    | Ft <200 ng/mL<br>IST <20%                                                                                                                                                                                         | Ft 1.200 ng/mL<br>IST 30%                                     |

Modificado de Del Vecchio et al, Hemodial Int. 2017;21 Suppl 1:S125-31. %Hypo, porcentaje de hematíes hipocromos (Hb intracelular CH <28 g/dL o contenido de Hb <17 pg); AEEs, agentes estimulantes de la eritropoyesis; CARI, *Caring for Australasians with Renal Impairment*, ERBP: *European Renal Best Practice*; ERC, enfermedad renal crónica; Ft, ferritina; IST: índice de saturación de la transferrina; KDIGO, *Kidney Disease Improving Global Outcomes*; KDOQI, *Kidney Disease Outcomes Quality Initiative*; NICE, *National Institute for Health and Clinical Excellence*.

**Tabla 4S. Tratamiento de la anemia y del DH en pacientes oncológicos. Recomendaciones de las sociedades médicas internacionales**

| Sociedad                    | Recomendaciones                                                                                                                                                                                                                                                                                                                                                                                                                                                                                                                                                                                              |
|-----------------------------|--------------------------------------------------------------------------------------------------------------------------------------------------------------------------------------------------------------------------------------------------------------------------------------------------------------------------------------------------------------------------------------------------------------------------------------------------------------------------------------------------------------------------------------------------------------------------------------------------------------|
| NCCN                        | <p>Indicada monoterapia con hierro, preferible FEEV:</p> <ul style="list-style-type: none"> <li>· En DH absoluto (Ft &lt;30 ng/mL, IST &lt;20%)</li> <li>· En pacientes en tratamiento con AEE con Ft 30-800 ng/mL (preferible no exceder límite crítico de 500 ng/mL) e IST 20-50% → riesgo de ferropenia funcional → suplementar Fe si beneficio &gt; riesgo esperados</li> <li>· Puede ↓ la transfusión en pacientes con DH funcional</li> </ul> <p>No administrar hierro si infección activa</p>                                                                                                         |
| ASH/ASCO                    | <p>Se recomienda monitorizar basal y periódicamente el estatus férrico</p> <p>Se recomienda suplementar hierro si DH. Puede ↑ respuesta a AEE</p> <p>No suficiente evidencia de más detalles sobre cómo realizar la terapia férrica ni de la periodicidad de su monitorización</p>                                                                                                                                                                                                                                                                                                                           |
| ESMO                        | <p>Se recomienda monitorización periódica de la homeostasis férrica y de la PCR</p> <p>FEEV en DH absoluto → más ↑ Hb que vía oral y ↓ necesidad transfusional</p>                                                                                                                                                                                                                                                                                                                                                                                                                                           |
| EORTC                       | <p>Restringir el aporte de hierro a pacientes con DH absoluto o funcional</p>                                                                                                                                                                                                                                                                                                                                                                                                                                                                                                                                |
| Grupo de Consenso Austriaco | <p>DH absoluto: IST &lt;20% y Ft &lt;30 ng/mL (&lt;100 ng/mL en oncológicos)</p> <p>Hierro oral preferible en pacientes no oncológicos o bien oncológicos en remisión completa y sin inflamación (PCR normal), y en pacientes sin enfermedades inflamatorias</p> <p>FEEV:</p> <ul style="list-style-type: none"> <li>· Para pacientes oncológicos con DH absoluto (IST &lt;20% y Ft &lt;100 µg/mL, incluso si ≥100 ng/mL)</li> <li>· Considerarlo en oncológicos sintomáticos por DH funcional</li> <li>· Considerar FEEV en pacientes con anemia inducida por QT y que requieran terapia con AEE</li> </ul> |

Ludwig H, Evstatiev R, Kornek G, Aapro M, Bauernhofer T, Buxhofer-Ausch V, et al. Iron metabolism and iron supplementation in cancer patients. *Wien Klin Wochenschr.* 2015;127:907-19.

AEE, agentes estimulantes de la eritropoyesis; ASH/ASCO, *American Society of Hematology/American Society of Clinical Oncology*; DH, déficit de hierro; EORTC, *European Organisation for Research and Treatment of Cancer*; ESMO, *European Society for Medical Oncology*; ev, endovenoso; FEEV, hierro endovenoso; Ft, ferritina; Hb, hemoglobina; IST, índice de saturación de la transferrina; NCCN, *National Comprehensive Cancer Network*; PCR, proteína C reactiva; QT, quimioterapia.

**Tabla 5S. Recomendaciones de monitorización de la anemia en pacientes críticos.**

|                                                                                                                                                                                                                                                                                                                                                                                                                                                                                                                                                                                                                                                                                                                                                                                                                                                                                                                                                                                                                                                                                                                                                                                                                                                                                                                                                                                                                     |
|---------------------------------------------------------------------------------------------------------------------------------------------------------------------------------------------------------------------------------------------------------------------------------------------------------------------------------------------------------------------------------------------------------------------------------------------------------------------------------------------------------------------------------------------------------------------------------------------------------------------------------------------------------------------------------------------------------------------------------------------------------------------------------------------------------------------------------------------------------------------------------------------------------------------------------------------------------------------------------------------------------------------------------------------------------------------------------------------------------------------------------------------------------------------------------------------------------------------------------------------------------------------------------------------------------------------------------------------------------------------------------------------------------------------|
| Si el hospital tiene un estudio de anemia centralizado por el Servicio de Hematología, implementarlo                                                                                                                                                                                                                                                                                                                                                                                                                                                                                                                                                                                                                                                                                                                                                                                                                                                                                                                                                                                                                                                                                                                                                                                                                                                                                                                |
| Si el hospital no dispone de un estudio de anemia centralizado,                                                                                                                                                                                                                                                                                                                                                                                                                                                                                                                                                                                                                                                                                                                                                                                                                                                                                                                                                                                                                                                                                                                                                                                                                                                                                                                                                     |
| <ul style="list-style-type: none"> <li>● recomendamos realizar una determinación de B12 y fólico en anemias normo-macroscíticas, especialmente en pacientes con riesgo de desnutrición, en cualquier momento, pero al menos una vez durante el ingreso en la UCI</li> <li>● realizar recuento de reticulocitos ante anemias normo-macroscíticas en cualquier momento, pero al menos una vez durante el ingreso en UCI</li> <li>● la haptoglobina no es un buen indicador de hemólisis en presencia de daño hepático pero, por su alto valor predictivo negativo, debe ser solicitada en caso de duda</li> <li>● en anemias sintomáticas con perfil ferrocinético de DFH y Ft entre 50 y 300 µg/L se recomienda consultar con el hematólogo de su centro qué medidas diagnósticas tienen disponibles (RsTf, hematíes hipocrómicos, hierro ligado a Ft sérica...) para ayudar a dilucidar si existe un verdadero DH</li> <li>● la valoración de la coagulación deberá tener en cuenta la cifra de plaquetas (preferiblemente en tubo de hemograma) e incluir, al menos periódicamente, el TTPA además de la actividad de protrombina. El fibrinógeno de Clauss deberá solicitarse cuando el fibrinógeno calculado esté disminuido por debajo de 100 y siempre que haya indicios de coagulopatía. La tromboelastografía, si está disponible, podría ayudar en el manejo de los pacientes con sangrado agudo</li> </ul> |
| DFH, déficit funcional de hierro; DH, déficit de hierro; Ft, ferritina; RsTf, receptor soluble de la transferrina; TTPA, tiempo de tromboplastina parcial activada; UCI, Unidad de Cuidados Intensivos.                                                                                                                                                                                                                                                                                                                                                                                                                                                                                                                                                                                                                                                                                                                                                                                                                                                                                                                                                                                                                                                                                                                                                                                                             |

**Tabla 6S. Donación de sangre y ferropenia: recomendaciones del Comité Científico para la Seguridad Transfusional del Ministerio de Sanidad, Consumo y Bienestar Social**

1. A los donantes de sangre, tanto esporádicos como regulares, se les debe suministrar información sobre la anemia y la ferropenia. La información deberá ser realista y veraz, adaptada a las características individuales de cada donante, pero en ningún caso generadora de alarma o incertidumbre innecesaria.
2. La información deberá presentarse para que sea percibida positivamente por el donante como parte del plan de cuidados que el centro de donación realiza.
3. Se les recomendará que informen de su condición de donantes de sangre cuando se les realice exámenes de salud, o controles analíticos.
4. El cuestionario de selección de los donantes deberá incluir preguntas dirigidas a identificar a donantes de riesgo de desarrollo de anemia-ferropenia.
5. Los dispositivos utilizados en el examen previo de la hemoglobina, deberán estar debidamente controlados para evitar la posible admisión errónea de donantes con niveles de hemoglobina inadecuados. En este sentido deberían ser de elección aquellos dispositivos que puedan ser debidamente calibrados o sometidos a control de calidad tanto interno como externo.
6. Por tratarse de una medida exenta de riesgos, los donantes deben recibir información sobre incluir en su dieta alimentos sanos con alto contenido en hierro. Esta información puede ofrecerse al donante mediante folletos informativos o en las páginas web de los centros de donación.
7. Aquellos donantes que, como parte de su cuidado de salud personal gusten de tomar suplementos o complejos vitamínicos, serán aconsejados para que elijan un preparado que también incluya suplementos de hierro.
8. No se recomienda la prescripción indiscriminada de suplementos de hierro a todos los donantes. Esta medida además del coste, no es siempre bien tolerada. Así mismo podría perjudicar a donantes susceptibles de sufrir sobrecarga de hierro.
9. Cada centro de donación, y teniendo en cuenta la demografía (sexo y edad) de su población de donantes, deberá establecer las medidas que considere más costeeffectivas y plausibles para identificar a aquellos donantes que por sus características tengan alto riesgo de desarrollo de ferropenia.
10. Entre estas medidas se incluyen:
  - Determinación del nivel de ferritina basal en la primera donación o al menos de las mujeres en edad fértil.
  - Cuando no se determine la ferritina, el nivel de hemoglobina del donante puede servir como elemento de orientación, ya que los donantes con niveles de hemoglobina en el límite bajo presentan mayor riesgo de desarrollo de anemia-ferropenia.
  - Propuesta de un plan de donación más específico para aquellos colectivos de donantes de riesgo: reducción del número de donaciones al año y/o prolongación de los intervalos entre donaciones.
  - Promover la donación de plaquetas y plasma mediante procesos de aféresis, reduciendo las donaciones de sangre total.
  - Administración de suplementos de hierro, con carácter profiláctico, solamente a aquellos donantes que presenten buena tolerancia al tratamiento, y que una vez informados opten, de manera voluntaria, por dicha alternativa.
11. Los donantes que sean admitidos de nuevo, tras ser rechazados temporalmente por ferropenia o anemia, se les ofrecerá un plan de donaciones personalizado que evite la recaída. A tales donantes se les puede ofrecer la toma de suplementos profilácticos, mientras exista buena tolerancia.
12. Debe existir un buen nivel de comunicación entre el centro de donación y el médico de familia, correspondiendo siempre a este último, el cuidado integral de la salud del donante.
13. Es recomendable en cualquier caso, la promoción de campañas de información general dirigidas a médicos de atención primaria, sobre la donación de sangre así como de sus consecuencias fisiológicas.

Estas recomendaciones se emitieron en mayo de 2013. Disponibles en [http://www.msbs.gob.es/profesionales/saludPublica/medicinaTransfusional/acuerdos/docs/DonacionSangre\\_Ferropenia.pdf](http://www.msbs.gob.es/profesionales/saludPublica/medicinaTransfusional/acuerdos/docs/DonacionSangre_Ferropenia.pdf)

**Tabla 7S. Recomendaciones del grupo de trabajo de la RICA sobre la anemia perioperatoria<sup>28</sup>**


---

|                                                                                                                                                                                                                                                                                                                                                                 |
|-----------------------------------------------------------------------------------------------------------------------------------------------------------------------------------------------------------------------------------------------------------------------------------------------------------------------------------------------------------------|
| <p><b>Punto 7.</b> “Se recomienda la detección de la anemia preoperatoria, puesto que está asociada a un aumento de mortalidad perioperatoria”. <b>Recomendación fuerte +. Nivel de evidencia alto</b></p>                                                                                                                                                      |
| <p><b>Punto 8.</b> “Se recomienda la realización de una determinación de hemoglobina (Hb) en pacientes a los que se va a realizar cirugía electiva, al menos 28 días antes de la cirugía, lo que permite un tiempo suficiente para la estimulación de la eritropoyesis, si fuera necesario”. <b>Recomendación fuerte +. Nivel de evidencia moderado</b></p>     |
| <p><b>Punto 9.</b> “Se sugiere que el nivel de Hb preoperatorio antes de la intervención quirúrgica se encuentre dentro de los márgenes de normalidad definidos por la Organización Mundial de la Salud (OMS) (varones: Hb &lt; 13 g/dL; mujeres: &lt; 12 g/dL)”. <b>Recomendación débil +. Nivel de evidencia moderado</b></p>                                 |
| <p><b>Punto 10.</b> “Se sugiere el tratamiento con hierro oral, en pacientes anémicos, durante 14 días previos a la intervención con 200 mg/día de sulfato ferroso; para aumentar la Hb preoperatoria y disminuir la transfusión sanguínea alogénica (TSA) en pacientes con cáncer colorrectal”. <b>Recomendación fuerte +. Nivel de evidencia moderado</b></p> |
| <p><b>Punto 11.</b> “Se sugiere el tratamiento con hierro endovenoso en pacientes anémicos que van a precisar cirugía ginecológica y colorrectal para aumentar la Hb preoperatoria y disminuir la TSA”. <b>Recomendación fuerte +. Nivel de evidencia moderado</b></p>                                                                                          |
| <p><b>Punto 12.</b> “Se sugiere el uso de hierro endovenoso, en lugar de hierro oral, en aquellos casos en que este se contraindique o el tiempo sea insuficiente”. <b>Recomendación fuerte +. Nivel de evidencia moderado</b></p>                                                                                                                              |

---

RICA, Vía Clínica de Recuperación Intensificada en Cirugía Abdominal.

**Tabla 8S. Recomendaciones del Documento Sevilla sobre el tratamiento farmacológico con hierro<sup>15</sup>**

- 
- En pacientes programados para cirugía electiva potencialmente sangrante sugerimos la administración preoperatoria de hierro oral para mejorar el nivel de hemoglobina (Hb) y reducir el porcentaje de pacientes que reciben transfusión sanguínea alogénica (TSA), siempre que se disponga de tiempo suficiente (al menos 1 mes) y no existan contraindicaciones. **Recomendación 2B**
  - En pacientes anémicos programados para cirugía mayor potencialmente sangrante, recomendamos la administración preoperatoria de hierro endovenoso en casos de intolerancia o contraindicación para hierro oral, poco tiempo antes de la cirugía, anemia preoperatoria moderada-grave, uso de estimuladores de la eritropoyesis, estado inflamatorio del paciente y/o sangrado perioperatorio estimado moderado. **Recomendación 1C**
  - En pacientes de cirugía mayor con alta probabilidad de desarrollar anemia postoperatoria moderada o grave sugerimos la administración de hierro endovenoso durante el periodo perioperatorio o postoperatorio inmediato para disminuir el porcentaje de pacientes expuestos a la TSA y conseguir una más rápida corrección de la anemia. Igualmente, se deben tratar los déficits de vitamina B<sub>12</sub> y folatos, aun sin anemia. **Recomendación 2B**
  - No recomendamos la administración de hierro oral como tratamiento de la anemia postoperatoria en pacientes sin anemia o déficit de hierro previos a la intervención. **Recomendación 1B**
  - La evidencia disponible no permite hacer recomendaciones sobre el uso de hierro en pacientes críticos, siendo urgente la realización de estudios sobre el uso de hierro oral y parenteral en este colectivo de pacientes. **Recomendación 0**
  - Dado que la administración de hierro endovenoso siempre da lugar a la presencia de hierro libre, no recomendamos su administración en pacientes con infección activa o con afectación hepática grave. **Recomendación 1C**
-

**Tabla 9S. Recomendaciones del Documento Sevilla sobre el tratamiento farmacológico con rHuEPO<sup>15</sup>**

- 
- Cirugía ortopédica programada. Recomendamos la administración preoperatoria o perioperatoria de rHuEPO para reducir la tasa transfusional, siempre que la anemia sea moderada (Hb entre 10 y 13 g/dL), y el riesgo de sangrado lo sea también. **Recomendación 1A**
  - Otras cirugías. Sugerimos la administración de rHuEPO para reducir la tasa transfusional en pacientes anémicos sometidos a cirugía mayor. **Recomendación 2A**
  - Pacientes críticos. No recomendamos el uso de rHuEPO para tratar la anemia y reducir la tasa transfusional en pacientes que no tengan una indicación previa, con la posible excepción de aquellos con traumatismos, especialmente con traumatismo craneoencefálico grave. **Recomendación 1A**
-



**Tabla 10S. Variables bioquímicas y del hemograma a considerar para el control del tratamiento con FEEV**

| <b>Parámetro</b>    | <b>Control DH</b>                          | <b>Comentarios</b>                                                                                                              |
|---------------------|--------------------------------------------|---------------------------------------------------------------------------------------------------------------------------------|
| <b>VCM</b>          | Microcitosis (<80 fL)                      | Poco específico y poco sensible<br>Valor en el control del tratamiento                                                          |
| <b>HCM</b>          | Hipocromía <29 pg                          | Sensible<br>Poco específico<br>Valor en el control del tratamiento                                                              |
| <b>ADE (RDW)</b>    | Anisocitosis (>15)                         | Sensible<br>Poco específico<br>Normalización tardía                                                                             |
| <b>%Hypo</b>        | >6%                                        | Sensible<br>Importante en el déficit funcional                                                                                  |
| <b>CHr y Ret-He</b> | <28 pg                                     | Sensible<br>Muy útil en el déficit funcional de Fe<br>Usar junto a %Hypo                                                        |
| <b>IST</b>          | <16% (déficit)<br><20% (déficit funcional) | Sensible y específico (anemia de tipo crónico)<br>IST >50% sospecha de sobrecarga (no útil inmediatamente después de hierro ev) |
| <b>Ft</b>           | Disminuida define el DH                    | Sensible<br>Ft <100 o <200 µg/L déficit funcional<br>Ft > 500 µg/L sospecha de sobrecarga                                       |
| <b>rsTf</b>         | Elevado<br>Dintel depende de metodología   | Se ha de normalizar                                                                                                             |
| <b>rsTf/Ft</b>      | Elevado<br>Dintel depende de metodología   | Con %Hypo, CHr o Ret-He (algoritmos diagnósticos)<br>Se ha de normalizar                                                        |

ADE (RDW), amplitud de distribución eritrocitaria; CHr, contenido de hemoglobina reticulocitaria; DH, déficit de hierro; FEEV, hierro endovenoso; Ft, ferritina; Hb, hemoglobina; HCM, hemoglobina corpuscular media; %Hypo, porcentaje de hematíes hipocromos; IST, índice de saturación de la transferrina; ev, endovenoso; Ret-He, equivalente de Hb de los reticulocitos; RsTf, receptor soluble de la transferrina; Tf, transferrina; VCM, volumen corpuscular medio.

**Figura 1S. Propuesta de actitud terapéutica ante la AF en el embarazo**

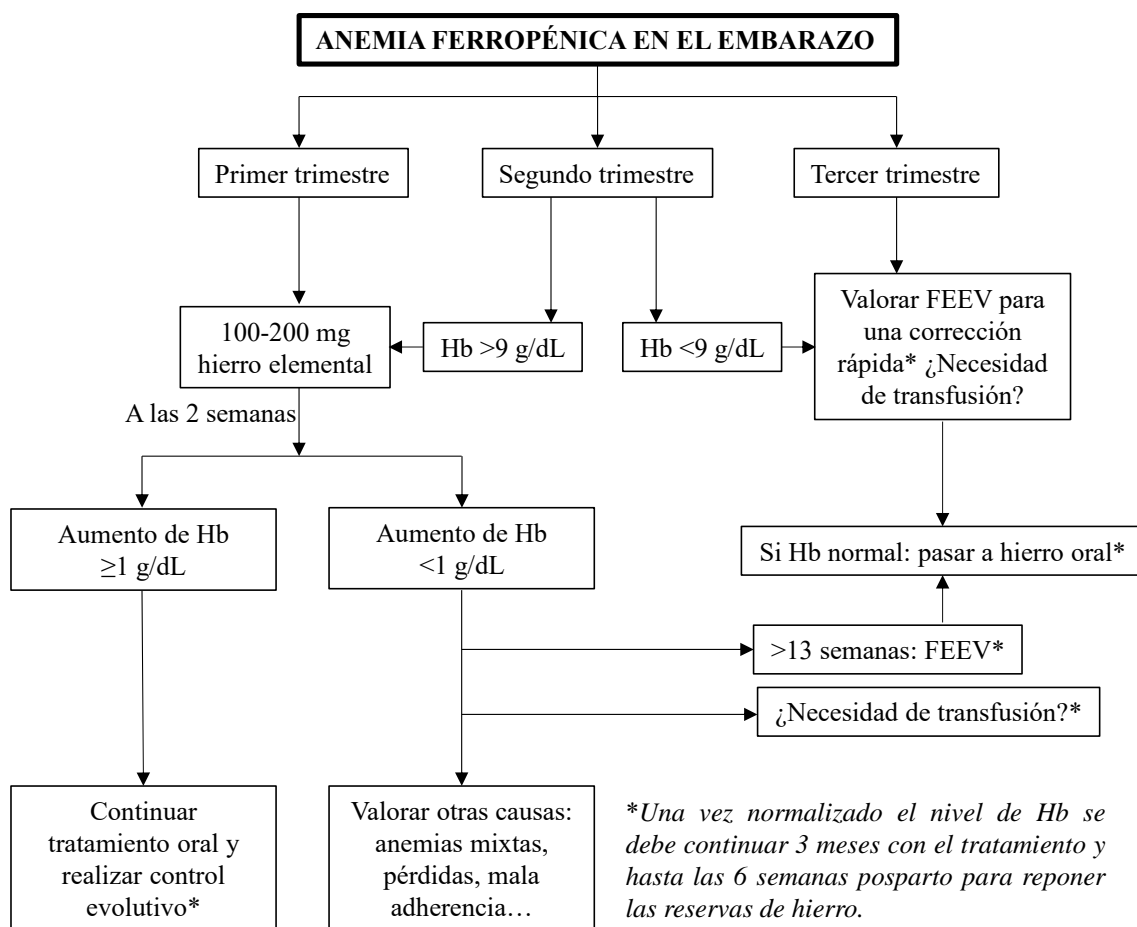

Hb, hemoglobina; FEEV, hierro endovenoso. Modificada de Achebe MM et al, Blood. 2017;129:940-9.
